# Supplementary material
Source: PubMed Central journal article supplement (PMC7513553)
Supplement: NIHMS1625590-supplement-Supplementary_Information.pdf [file NIHMS1625590-supplement-Supplementary_Information.pdf]

## Supplementary Figure S1.

### Online Consensus Site Screen 2

DAD Consensus   Cases   Review   Consensus (1) ▾

Assessments   Clinical Dementia Rating

Case id      D103031

Please click your rating for each of the following domain by clicking the appropriate boxes

Memory   Please select ▾

Orientation   Please select ▾

Judgment & Problem Solving   Please select ▾

Community Affairs   Please select ▾

Home and Hobbies   Please select ▾

Personal Care   Please select ▾

Rating confidence   Please select ▾

Comments  

Dementia   Does this respondent have dementia?  Yes  No

## Supplementary Figure S2.

### Popup Screen for Orientation Domain

| [ Respondent interview ]                                                       |                                                                                               |
|--------------------------------------------------------------------------------|-----------------------------------------------------------------------------------------------|
| <b>Time Orientation</b>                                                        | Correct, incorrect, don't know, refused                                                       |
| What is the year?                                                              | <b>don't know</b>                                                                             |
| ... season                                                                     | <b>Incorrect</b>                                                                              |
| ... date                                                                       | <b>don't know</b>                                                                             |
| ... day of the week                                                            | <b>don't know</b>                                                                             |
| ... month                                                                      | <b>Correct</b>                                                                                |
| <b>Place Orientation</b>                                                       | Correct, incorrect, don't know, refused                                                       |
| Can you tell me where we are now? what state?                                  | <b>Incorrect</b>                                                                              |
| ... city or village                                                            | <b>Correct</b>                                                                                |
| ... floor of the building                                                      | <b>Correct</b>                                                                                |
| ... hospital name                                                              | <b>Correct</b>                                                                                |
| ... area of town/village                                                       | <b>Correct</b>                                                                                |
| <b>total number of correct answers:</b>                                        | <b>5 (0-10)</b>                                                                               |
| [ Informant interview ]                                                        |                                                                                               |
| <b>Compared to 10 years ago, how is R at remembering</b>                       | Much improved, a bit improved, not much changed, a bit worse, much worse, don't know, refused |
| Address and telephone number                                                   | <b>does not apply</b>                                                                         |
| What day and month it is                                                       | <b>Much worse</b>                                                                             |
| <b>Signs of impairment</b>                                                     | Yes, sometimes, no                                                                            |
| Forget where s/he is                                                           | <b>No</b>                                                                                     |
| Get lost in the community, such as finding the post office or friends' houses  | <b>Sometimes</b>                                                                              |
| Get lost in own home, such as when finding the toilet                          | <b>No</b>                                                                                     |
| Ability to find his/her way about indoors at home or other familiar locations? | <b>No Loss</b>                                                                                |
| Ability to find his/her way around familiar streets?                           | <b>No Loss</b>                                                                                |
| Tending to dwell on the past.                                                  | <b>None</b>                                                                                   |

## Supplementary Table S1

Sample characteristics

|                       | <i>N</i> | <i>%</i> |
|-----------------------|----------|----------|
| <b>Overall</b>        | 60       |          |
| <b>Age</b>            |          |          |
| 50-59                 | 4        | 6.7      |
| 60-69                 | 23       | 38.3     |
| 70-79                 | 26       | 43.3     |
| 80-89                 | 7        | 11.7     |
| <b>Sex</b>            |          |          |
| Male                  | 40       | 66.7     |
| Female                | 20       | 33.3     |
| <b>Marital Status</b> |          |          |
| Married               | 57       | 95.0     |
| Widowed               | 3        | 5.0      |
| Divorced              |          |          |
| <b>Education</b>      |          |          |
| No school             | 9        | 15.0     |
| 1-5 years             | 10       | 16.7     |
| 6-9 years             | 6        | 10.0     |
| 10-19 years           | 35       | 58.3     |

## Supplementary Table S2

Domain-specific Clinical Dementia Rating Difference: In-person Rating – Online Rating

| Case No | Memory    | Orientation | Judgment  | Social & community activities | Home & hobbies | Personal care |
|---------|-----------|-------------|-----------|-------------------------------|----------------|---------------|
| 1       | -0.5      | 0           | -0.5      | 0                             | -1             | 0             |
| 1       | -0.5      | 0           | -0.5      | 0                             | -0.5           | 0             |
| 1       | -0.5      | 0.5         | 0         | 0                             | -1             | 0             |
| 2       | -0.5      | -0.5        | 0         | 0                             | -0.5           | 0.5           |
| 2       | -0.5      | -0.5        | -0.5      | 0                             | -0.5           | 0             |
| 2       | -0.5      | -0.5        | -0.5      | 0                             | -0.5           | 0             |
| 3       | 0         | 0           | 0         | 0                             | 0              | 0.5           |
| 3       | 0.5       | 0           | 0         | 0                             | 0              | 0             |
| 3       | 0         | 0           | -0.5      | 0.5                           | 0              | 0.5           |
| 3       | <b>1</b>  | 0.5         | -0.5      | 0.5                           | 0.5            | <b>1</b>      |
| 4       | -0.5      | <b>-1</b>   | -0.5      | 0                             | 0              | 0             |
| 4       | -0.5      | -0.5        | -0.5      | 0                             | <b>1</b>       | 0             |
| 4       | -0.5      | -0.5        | -0.5      | -0.5                          | 0              | 0             |
| 5       | <b>-1</b> | -0.5        | <b>-1</b> | -0.5                          | -0.5           | 0             |
| 5       | -0.5      | -0.5        | -0.5      | -0.5                          | -0.5           | 0             |
| 6       | 0         | 0           | 0         | 0                             | 0.5            | 0             |
| 6       | 0         | 0           | 0         | <b>1</b>                      | 0.5            | 0.5           |
| 7       | -0.5      | -0.5        | -0.5      | <b>-1.5</b>                   | 0              | 0             |
| 7       | -0.5      | -0.5        | -0.5      | <b>-1.5</b>                   | 0              | -0.5          |
| 7       | <b>-1</b> | <b>-1</b>   | -0.5      | <b>-1.5</b>                   | 0              | 0             |
| 8       | 0         | -0.5        | <b>-1</b> | 0.5                           | 0              | 0             |
| 8       | -0.5      | -0.5        | <b>-1</b> | 0.5                           | 0              | 0             |
| 8       | 0         | -0.5        | <b>-1</b> | 0.5                           | 0              | 0             |
| 8       | 0         | -0.5        | <b>-1</b> | 0.5                           | 0              | 0             |
| 9       | -0.5      | -0.5        | 0         | 0                             | 0              | 0             |
| 9       | -0.5      | -0.5        | 0         | 0                             | 0              | 0             |
| 9       | -0.5      | -0.5        | 0         | 0                             | 0              | 0             |
| 9       | 0         | -0.5        | 0         | 0                             | 0              | 0             |
| 10      | 0         | 0.5         | 0.5       | 0                             | 0              | <b>1</b>      |
| 10      | 1         | 0.5         | 0.5       | 0                             | 0              | <b>1</b>      |
| 10      | 1         | 0.5         | 0.5       | 0                             | 0              | <b>1</b>      |
| 11      | 0         | 0           | 0         | <b>1.5</b>                    | 0.5            | 0             |
| 11      | 0         | 0           | 0.5       | <b>1.5</b>                    | 0              | 0             |
| 11      | 0         | 0           | 0         | 0.5                           | 0.5            | 0             |
| 12      | 0         | 0           | 0.5       | 0.5                           | 0              | <b>-1</b>     |
| 12      | -0.5      | 0           | 0         | -0.5                          | <b>-1</b>      | 0             |
| 12      | -0.5      | -0.5        | -0.5      | <b>-1</b>                     | <b>-1</b>      | 0             |

12

-0.5

-0.5

-0.5

-1

-1

0

---
